# Supplementary material for: Comparison of whole transcriptome sequencing of fresh, frozen, and formalin-fixed, paraffin-embedded cardiac tissue
Source: PubMed Central journal article supplement (PMC10058139; doi:10.1371/journal.pone.0283159), 2023-03-29
Supplement: pone.0283159.s002.pdf [file pone.0283159.s002.pdf]

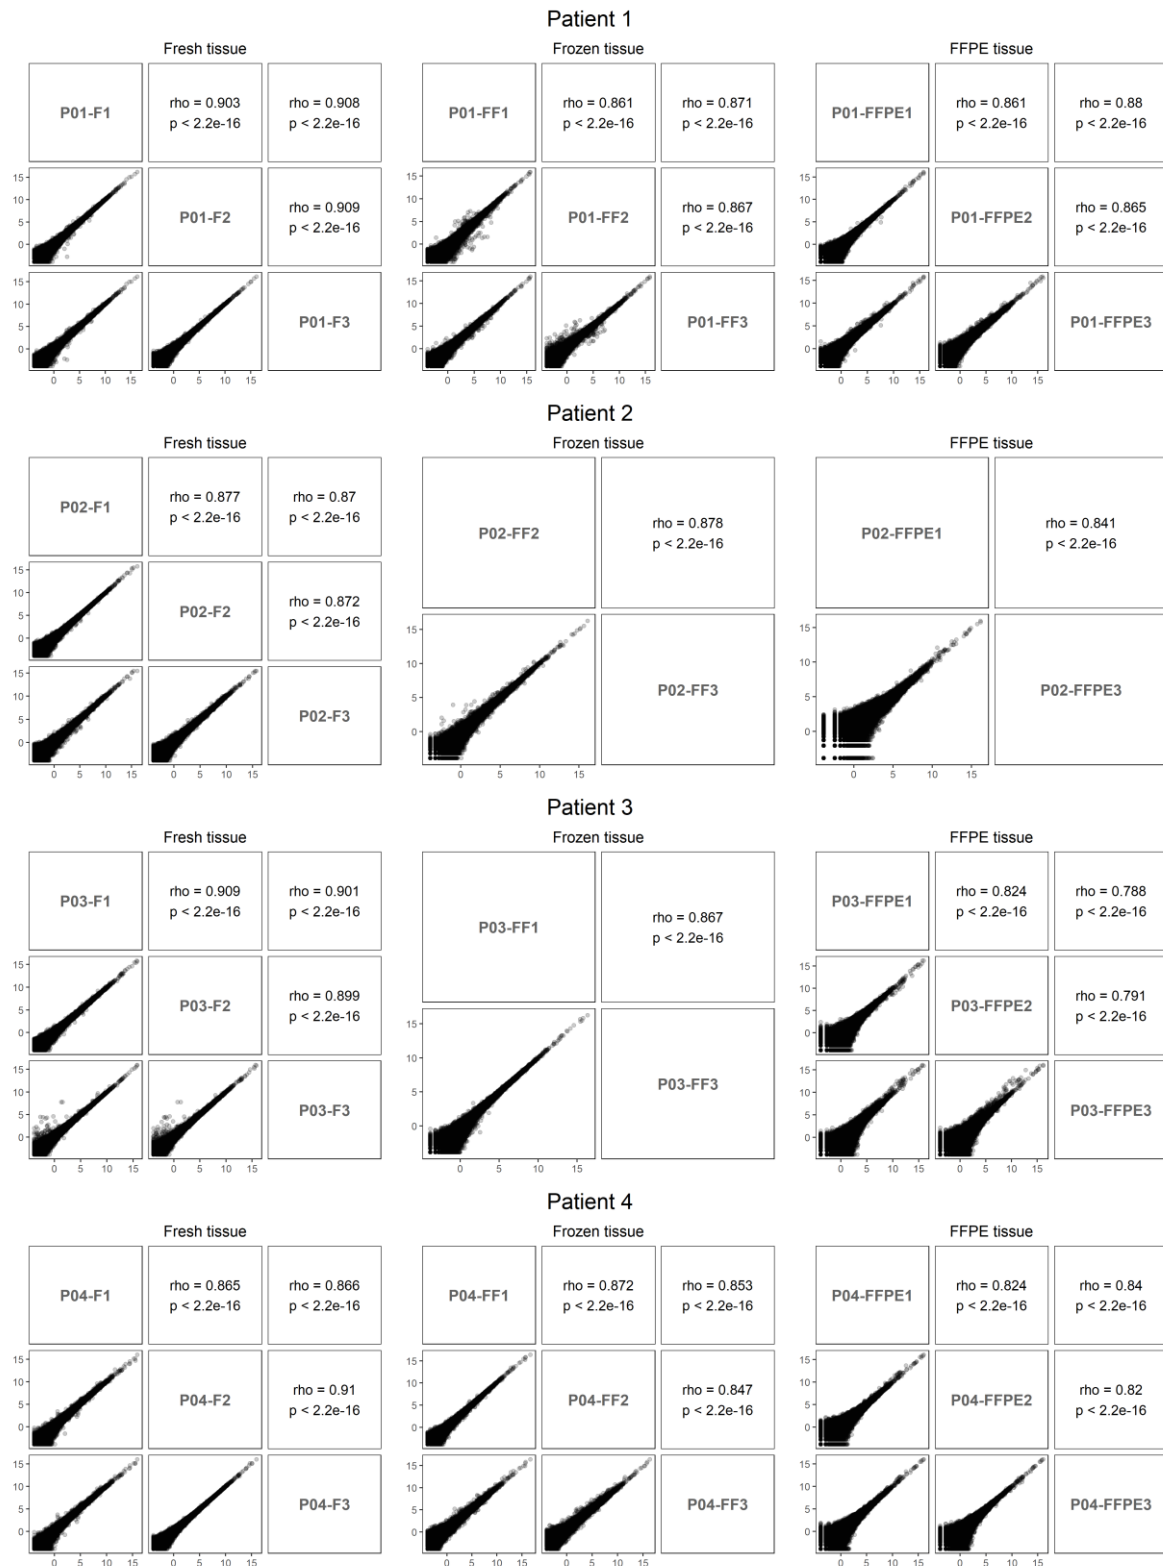

**S2 Fig: Spearman's correlation analysis of replicate RNA sequencing investigations in fresh, frozen, and FFPE tissues.** Diagonal plots show sample ID, the lower panel shows scatter plots of the paired comparison between gene expression in terms of the  $\log_2(\text{counts-per-million})$ , and the upper panel states the Spearman's correlation coefficient ( $\rho$ ) and p-value ( $p$ ).

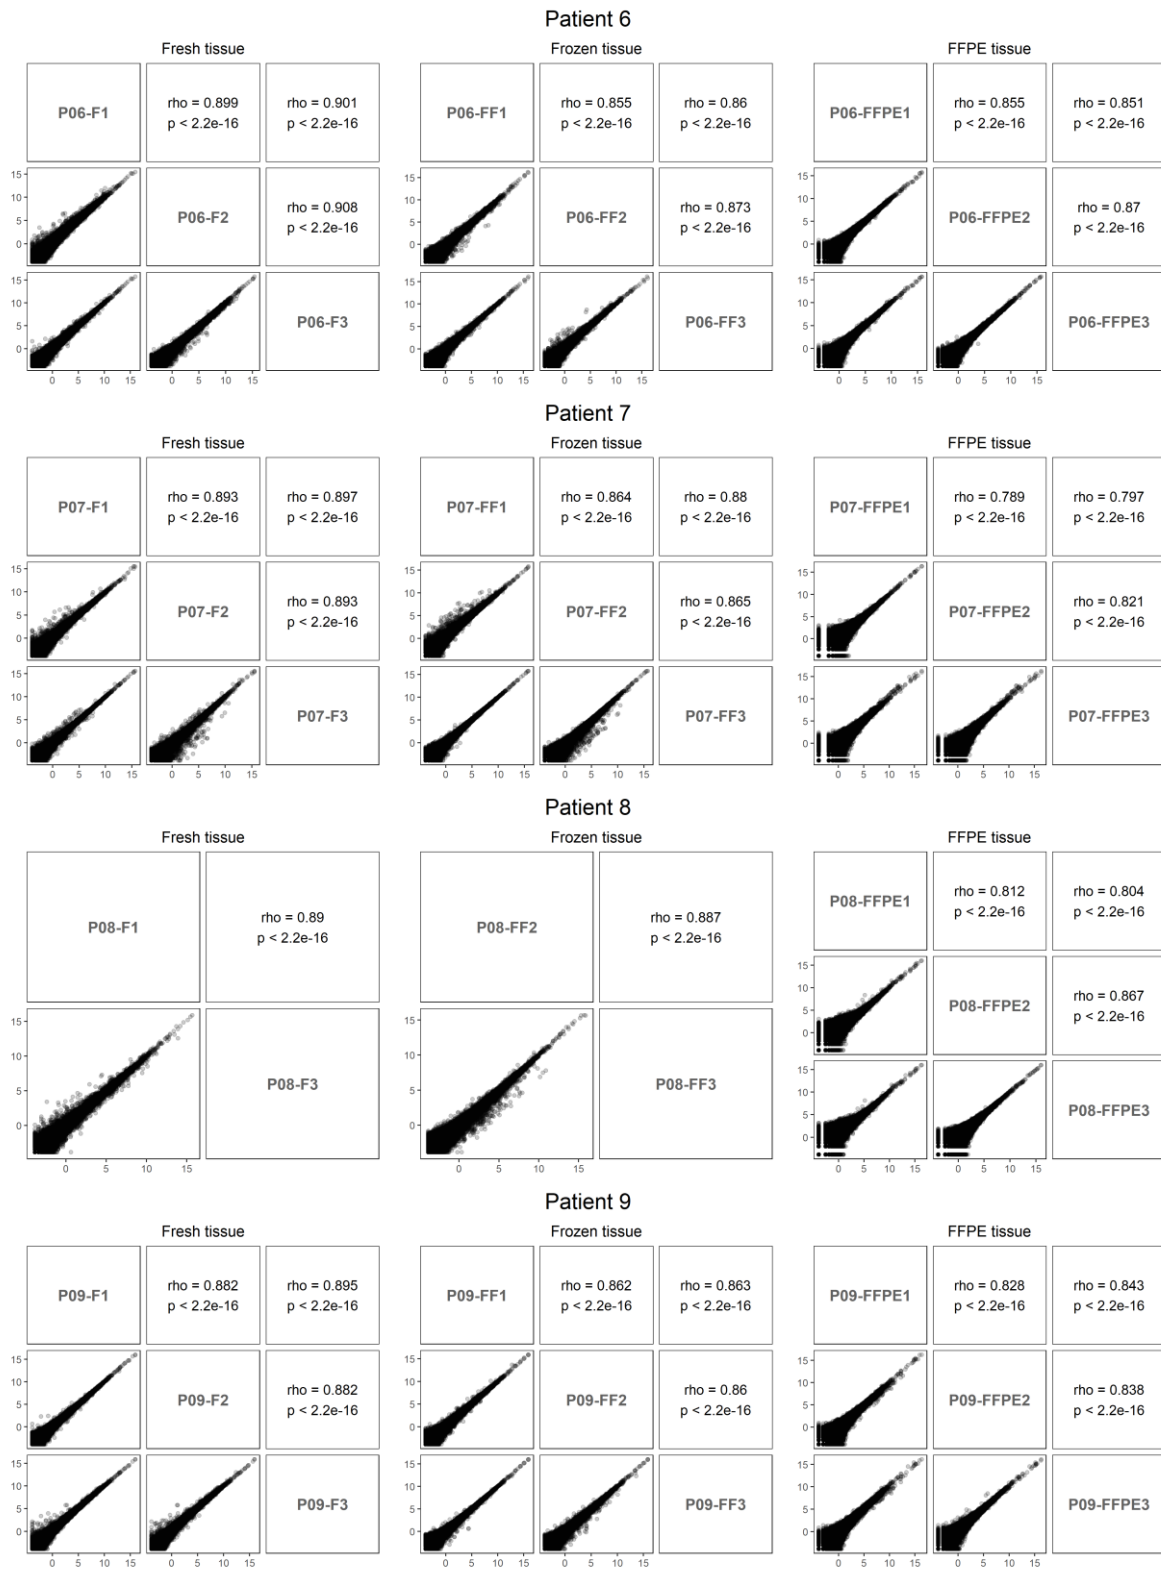

**S2 Fig: Spearman's correlation analysis of replicate RNA sequencing investigations in fresh, frozen, and FFPE tissues - continued.**

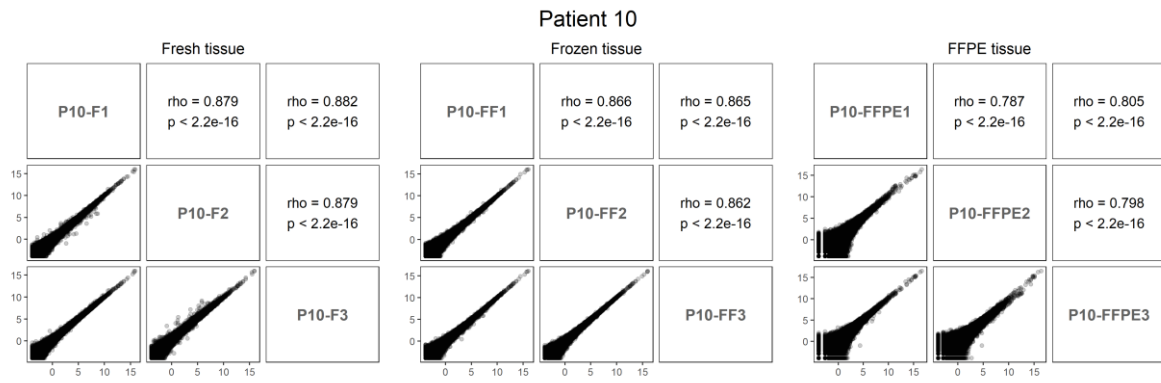

**S2 Fig: Spearman's correlation analysis of replicate RNA sequencing investigations in fresh, frozen, and FFPE tissues - continued.**
