# Supplementary material for: Comparison of whole transcriptome sequencing of fresh, frozen, and formalin-fixed, paraffin-embedded cardiac tissue
Source: PubMed Central journal article supplement (PMC10058139; doi:10.1371/journal.pone.0283159), 2023-03-29
Supplement: pone.0283159.s007.pdf [file pone.0283159.s007.pdf]

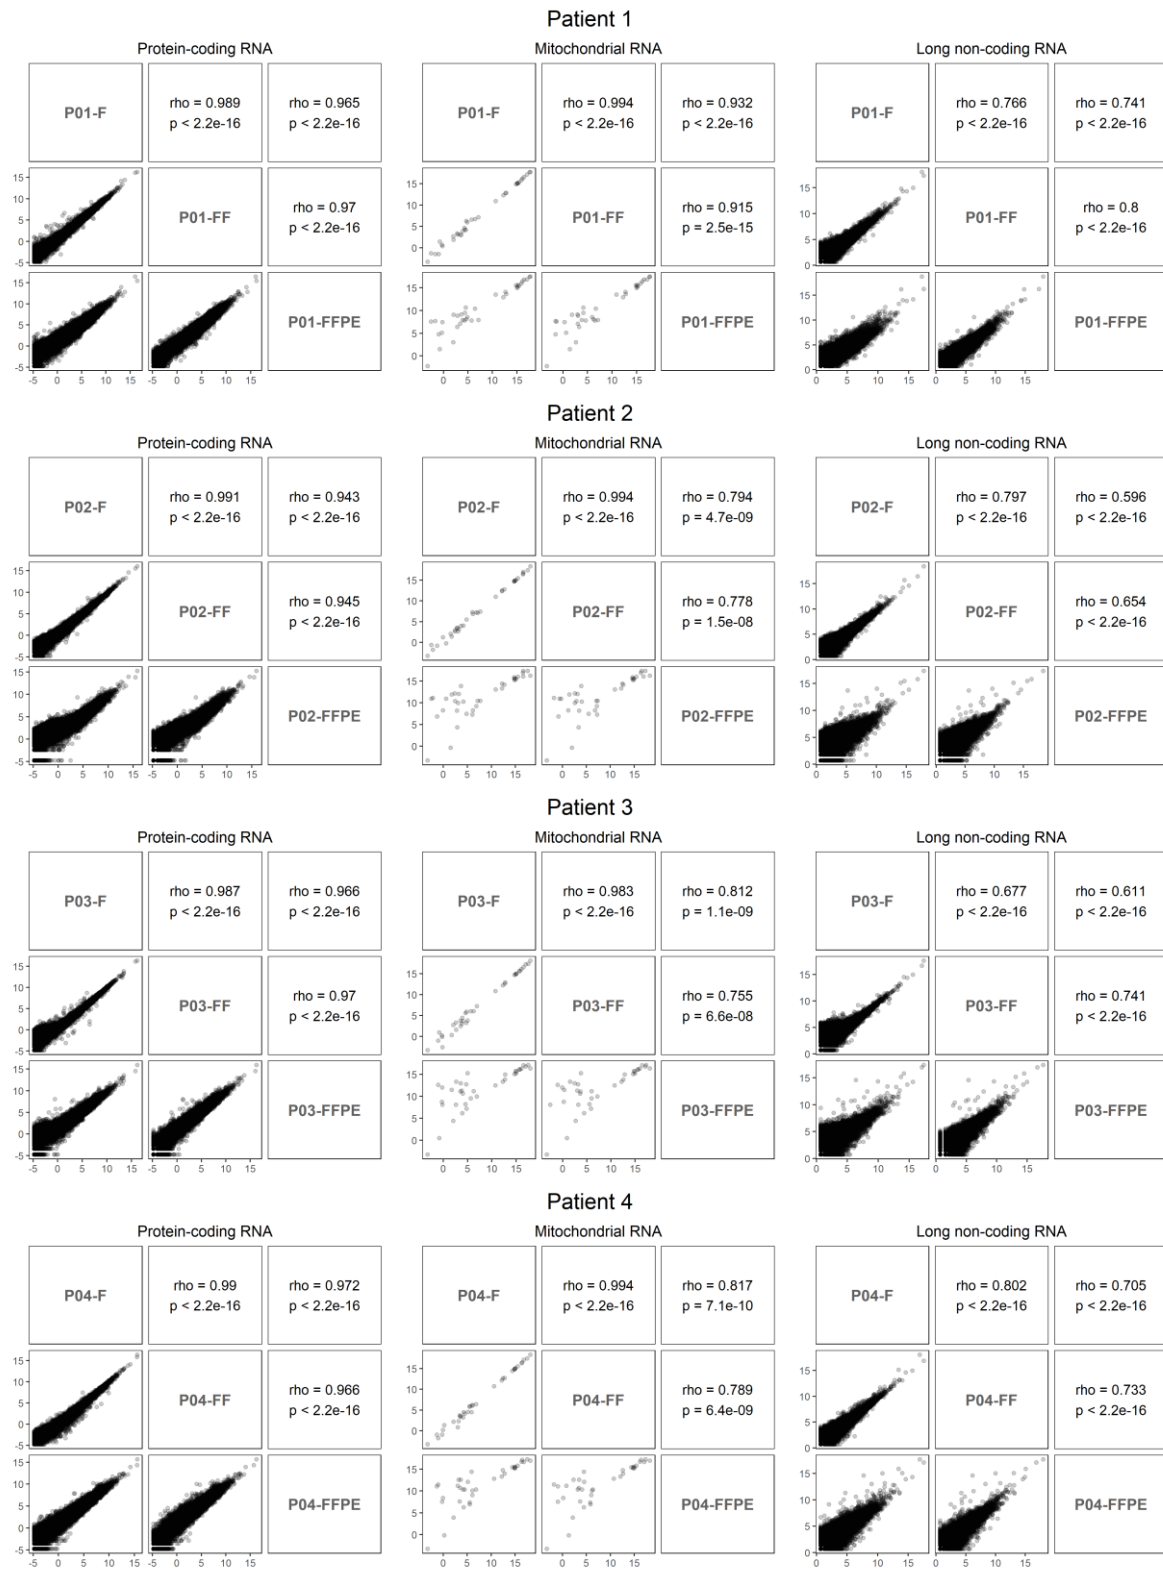

**S7 Fig: Spearman's correlation of protein-coding RNAs, mitochondrial RNAs, and long non-coding RNAs in fresh, frozen, and FFPE tissues for all patients.**

Diagonal plots show sample ID, the lower panel shows scatter plots of the paired comparison between gene expression in terms of the  $\log_2(\text{counts-per-million})$ , and the upper panel states the Spearman's correlation coefficient ( $\rho$ ) and p-value ( $p$ ).

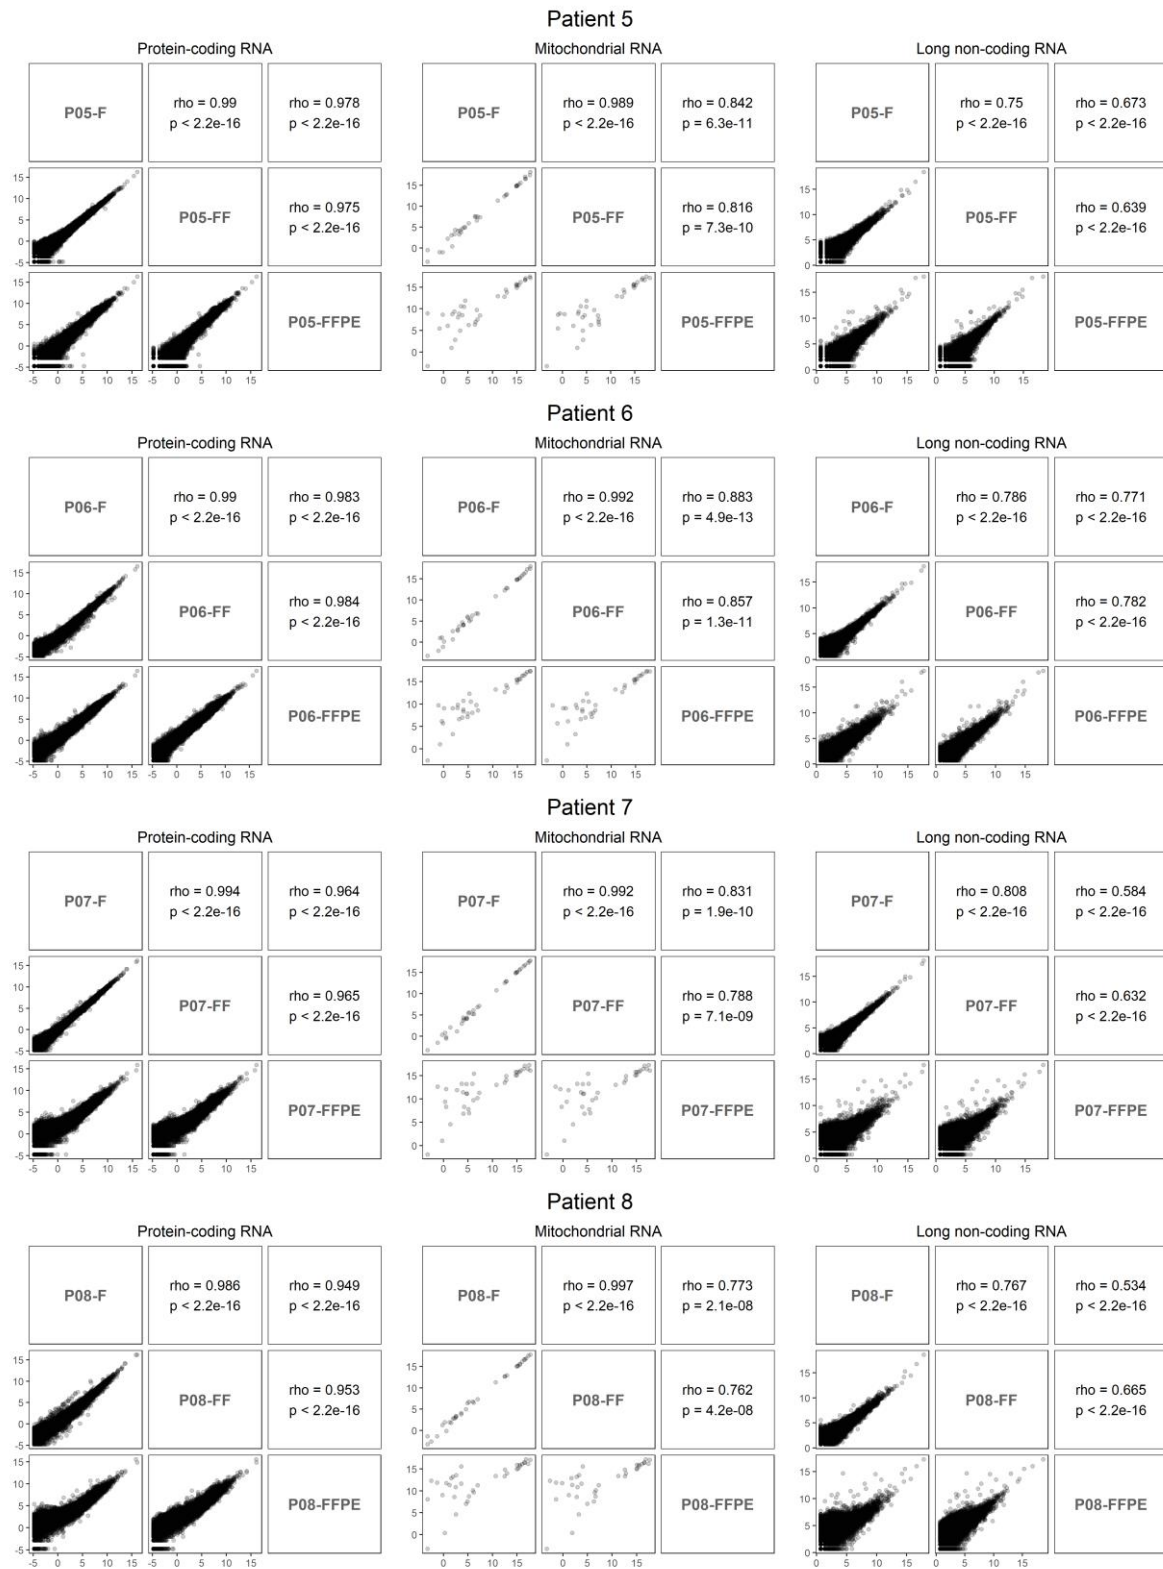

**S7 Fig: Spearman's correlation of protein-coding RNAs, mitochondrial RNAs, and long non-coding RNAs in fresh, frozen, and FFPE tissues for all patients - continued.**

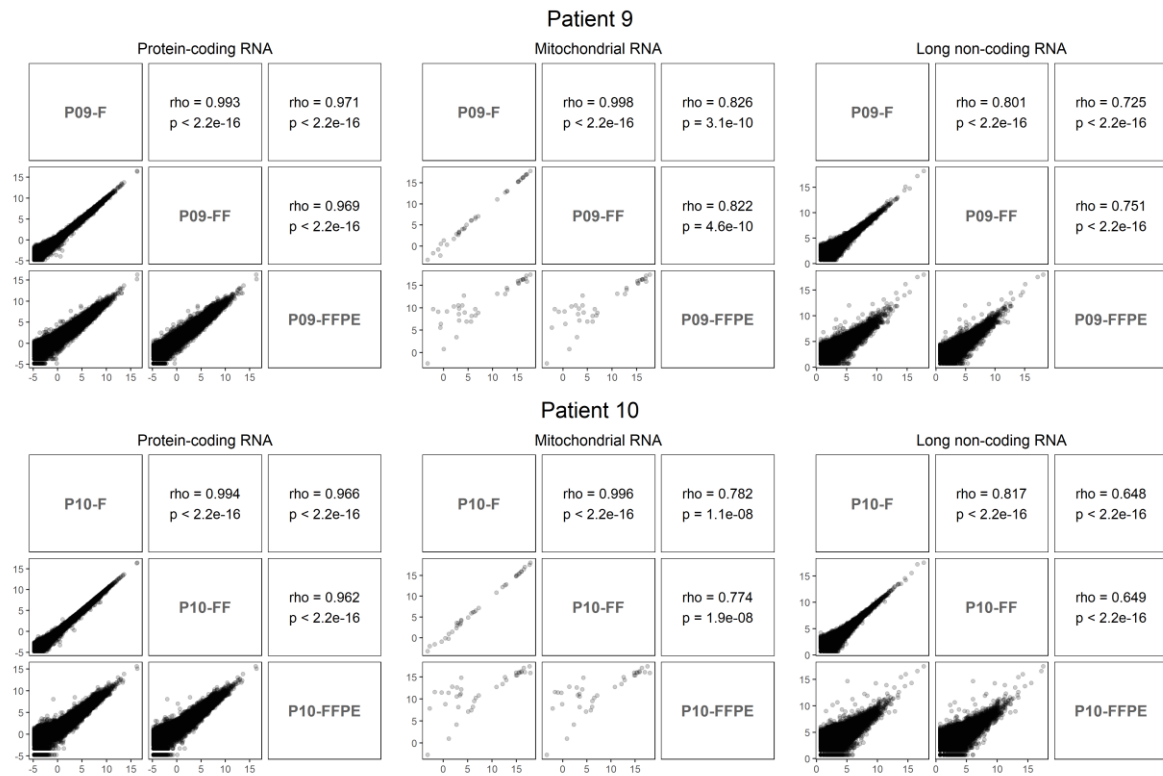

**S7 Fig: Spearman's correlation of protein-coding RNAs, mitochondrial RNAs, and long non-coding RNAs in fresh, frozen, and FFPE tissues for all patients - continued.**
