# Supplementary material for: Comparison of whole transcriptome sequencing of fresh, frozen, and formalin-fixed, paraffin-embedded cardiac tissue
Source: PubMed Central journal article supplement (PMC10058139; doi:10.1371/journal.pone.0283159), 2023-03-29
Supplement: pone.0283159.s011.pdf [file pone.0283159.s011.pdf]

### Unfiltered

n = 19,461 genes

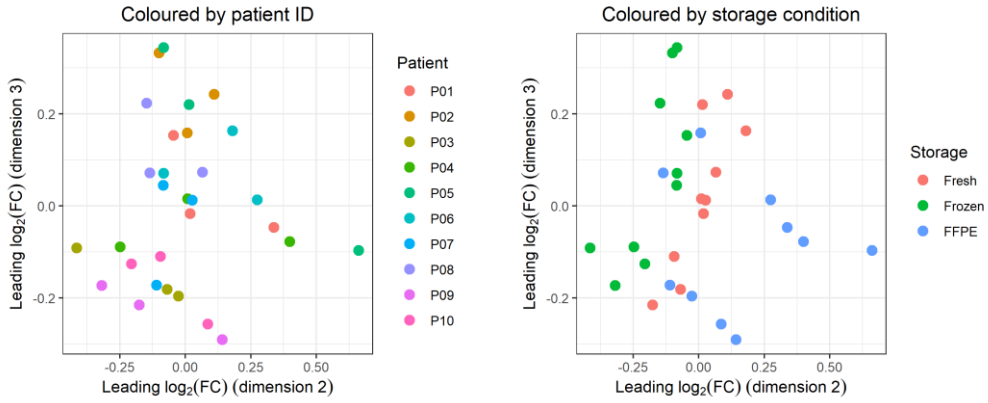

Filter :  $\log_2(\text{CPM}) > 0$

n = 12,177 genes

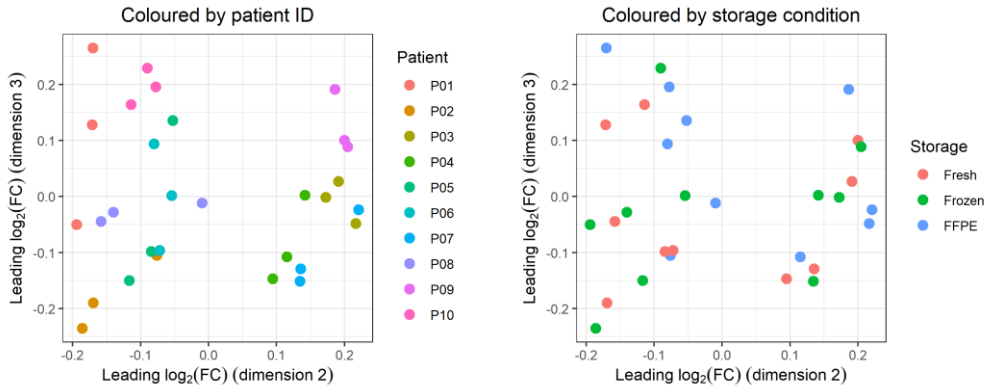

Filter :  $\log_2(\text{CPM}) > 5$

n = 3,640 genes

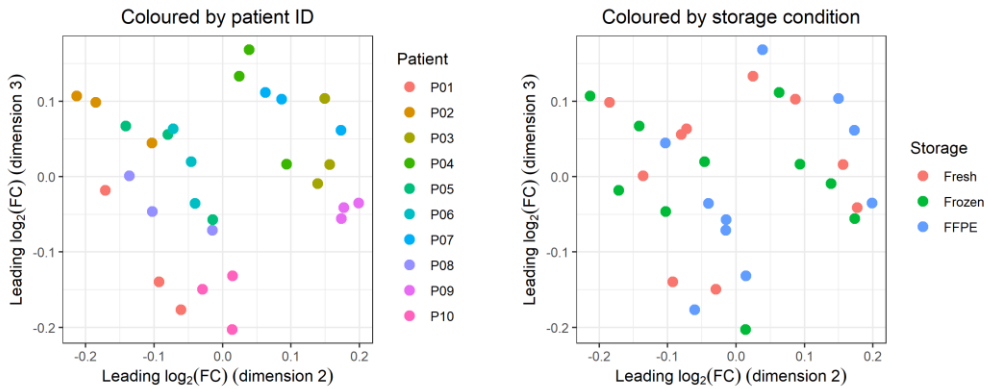

**S11 Fig: Multidimensional scaling (MDS) plots (dimensions 2 and 3) of gene expression profiles of the unfiltered and filtered protein-coding RNA subset.**

Abbreviations: CPM = Counts-per-million, FC = Fold-change, FFPE = Formalin-fixed, paraffin-embedded.
